# Supplementary material for: An EWS-FLI1-Induced Osteosarcoma Model Unveiled a Crucial Role of Impaired Osteogenic Differentiation on Osteosarcoma Development
Source: PubMed Central journal article supplement — Stem Cell Reports. 2016 Mar 17;6(4):592–606. doi: 10.1016/j.stemcr.2016.02.009 (PMC4834047; doi:10.1016/j.stemcr.2016.02.009), 2016-03-17
Supplement: mmc1.pdf [file mmc1.pdf]

Stem Cell Reports, Volume 6

## Supplemental Information

### **An *EWS-FLI1*-Induced Osteosarcoma Model Unveiled a Crucial Role of Impaired Osteogenic Differentiation on Osteosarcoma Development**

**Shingo Komura, Katsunori Semi, Fumiaki Itakura, Hirofumi Shibata, Takatoshi Ohno, Akitsu Hotta, Knut Woltjen, Takuya Yamamoto, Haruhiko Akiyama, and Yasuhiro Yamada**

A

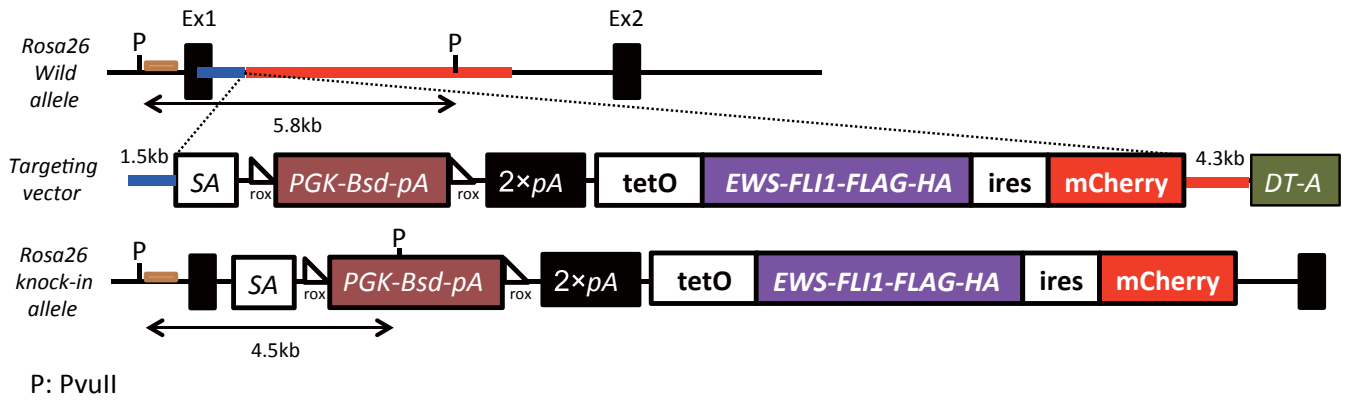

B

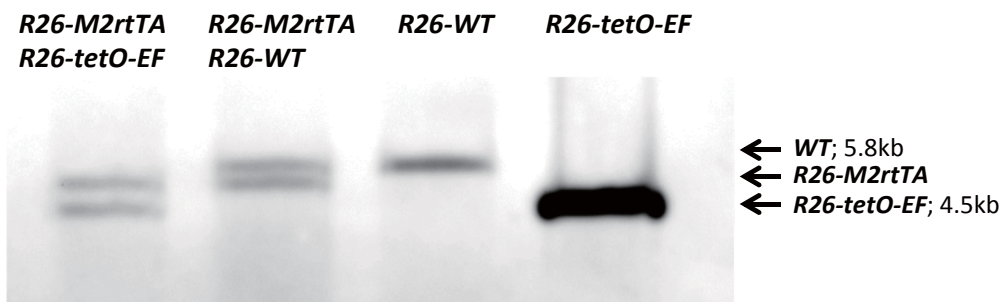

C

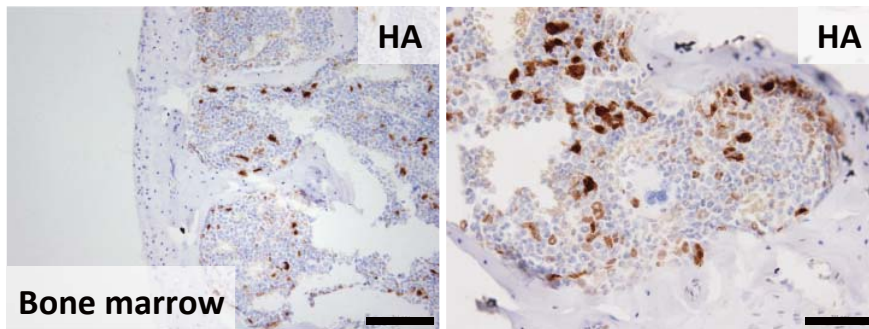

D

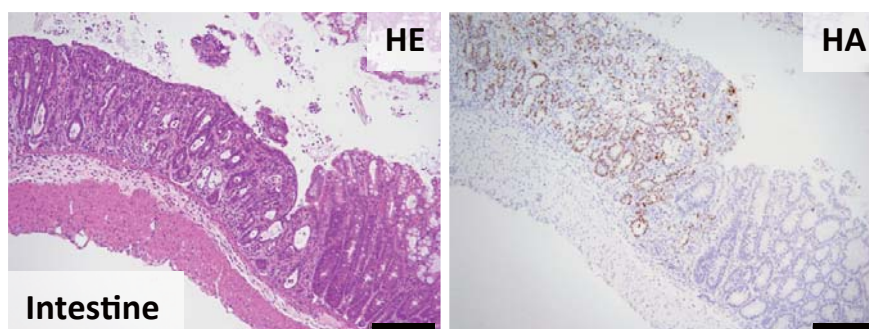

Figure S2

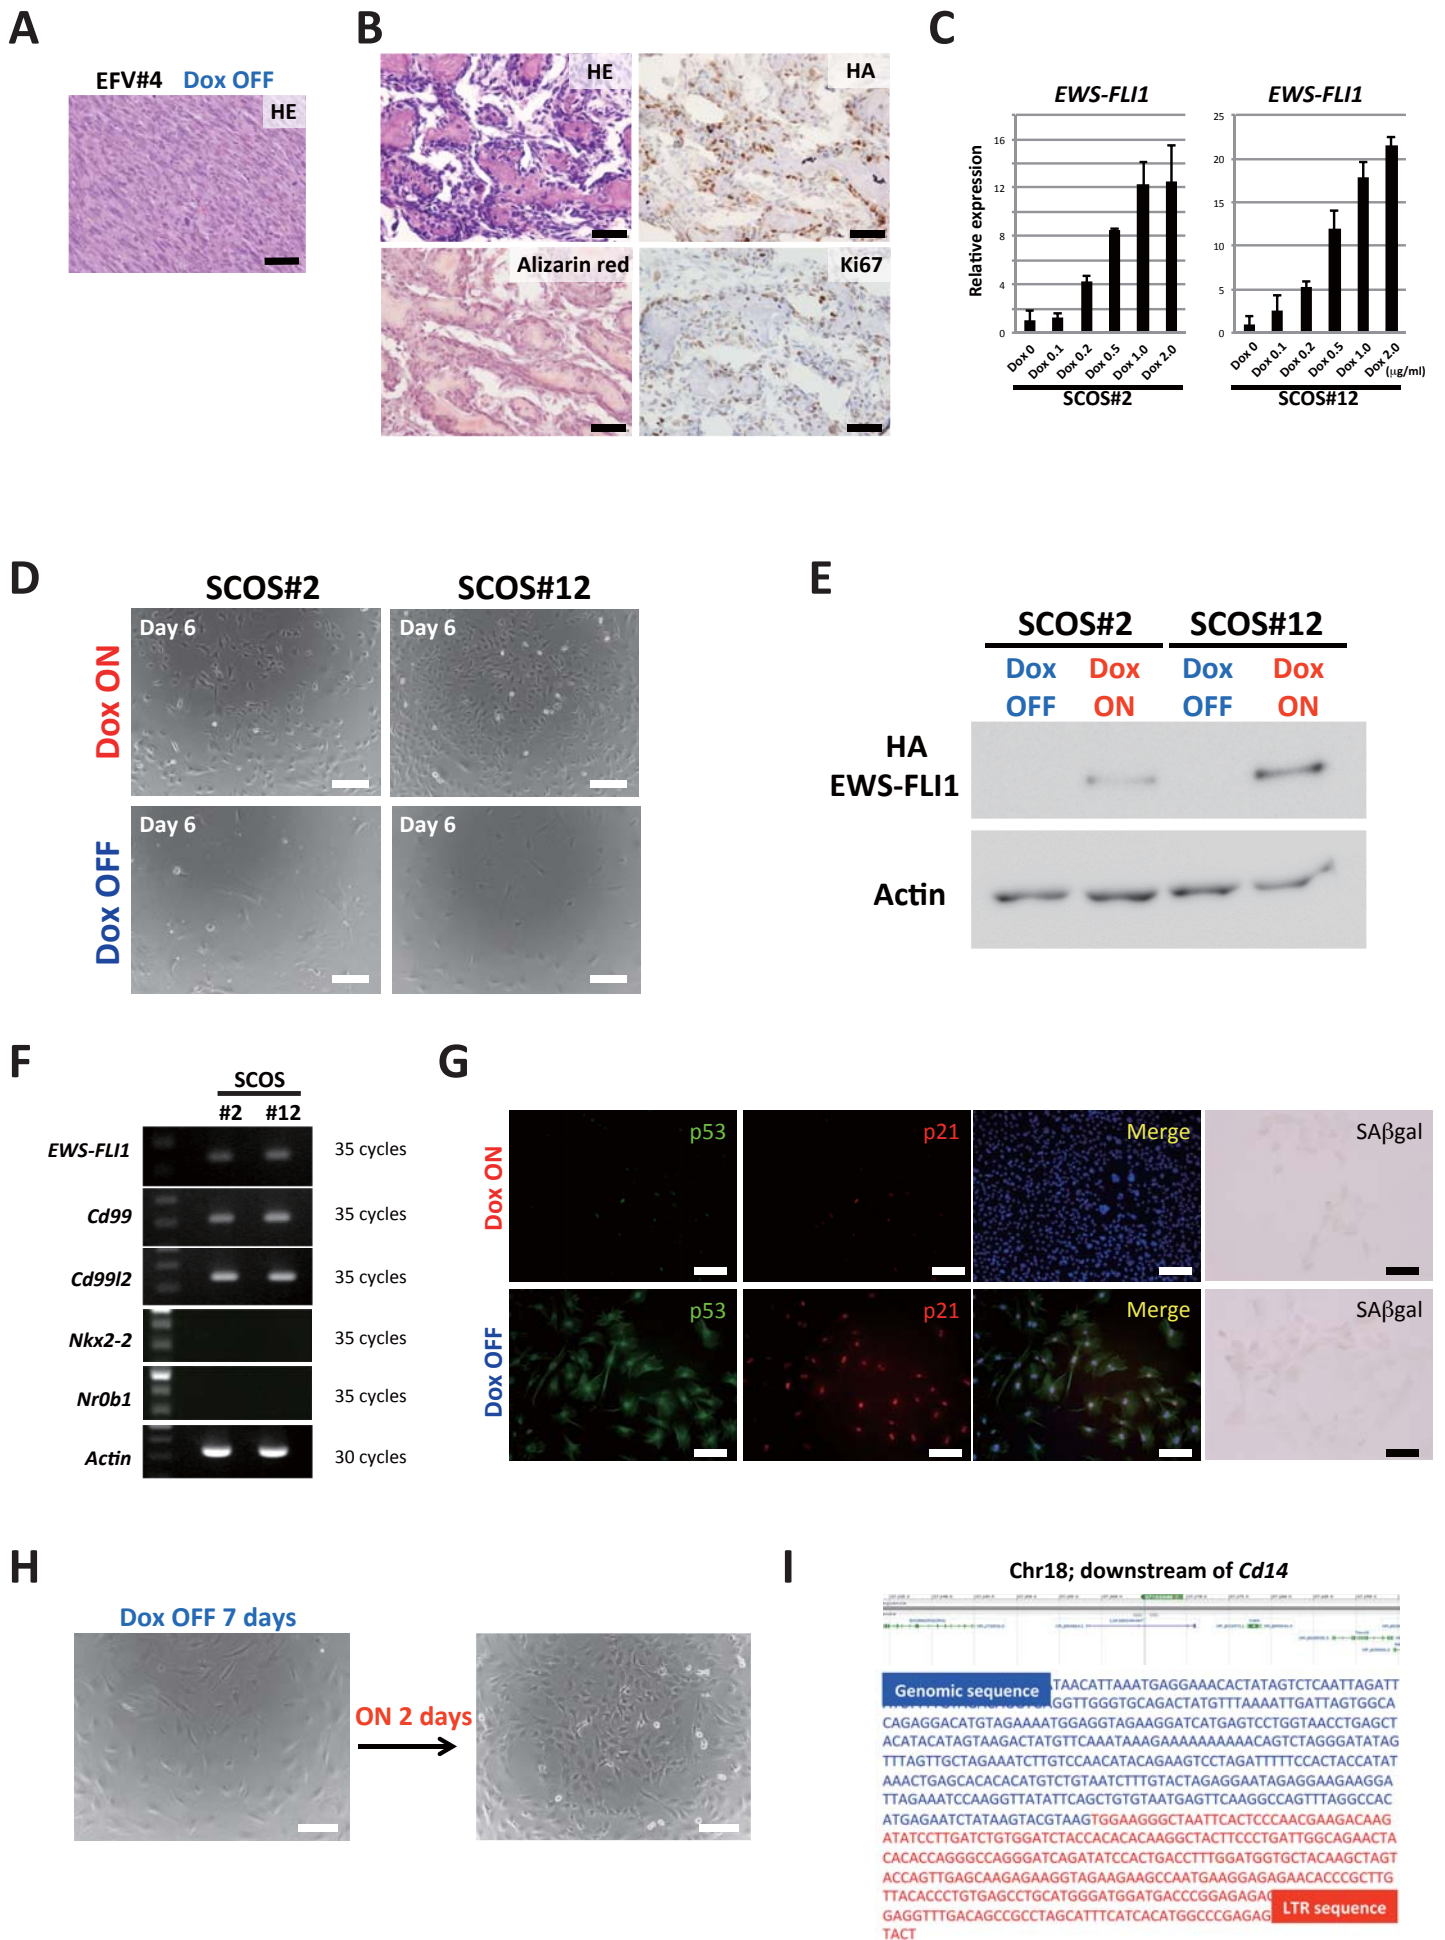

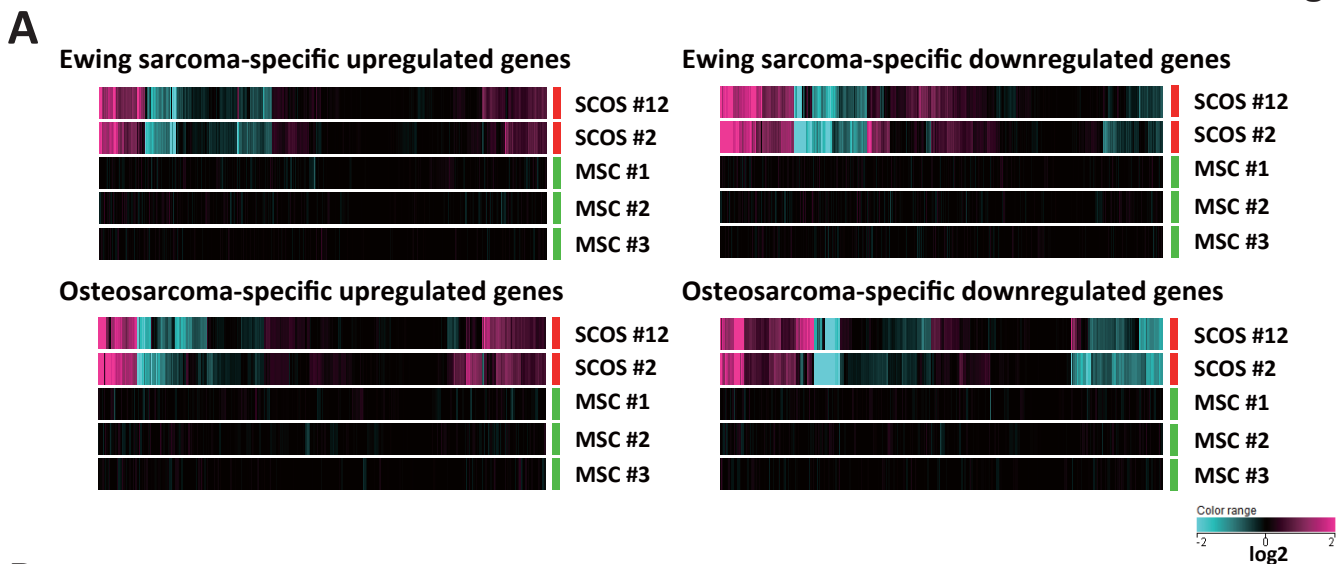

**B**

| GO ACCESSION | GO Term                   | corrected p-value |
|--------------|---------------------------|-------------------|
| GO:0005576   | extracellular region      | 1.06E-21          |
| GO:0044421   | extracellular region part | 2.16E-16          |
| GO:0005615   | extracellular space       | 9.86E-08          |
| GO:0031012   | extracellular matrix      | 7.89E-07          |
| GO:0006950   | response to stress        | 2.18E-05          |
| GO:0006955   | immune response           | 3.68E-05          |

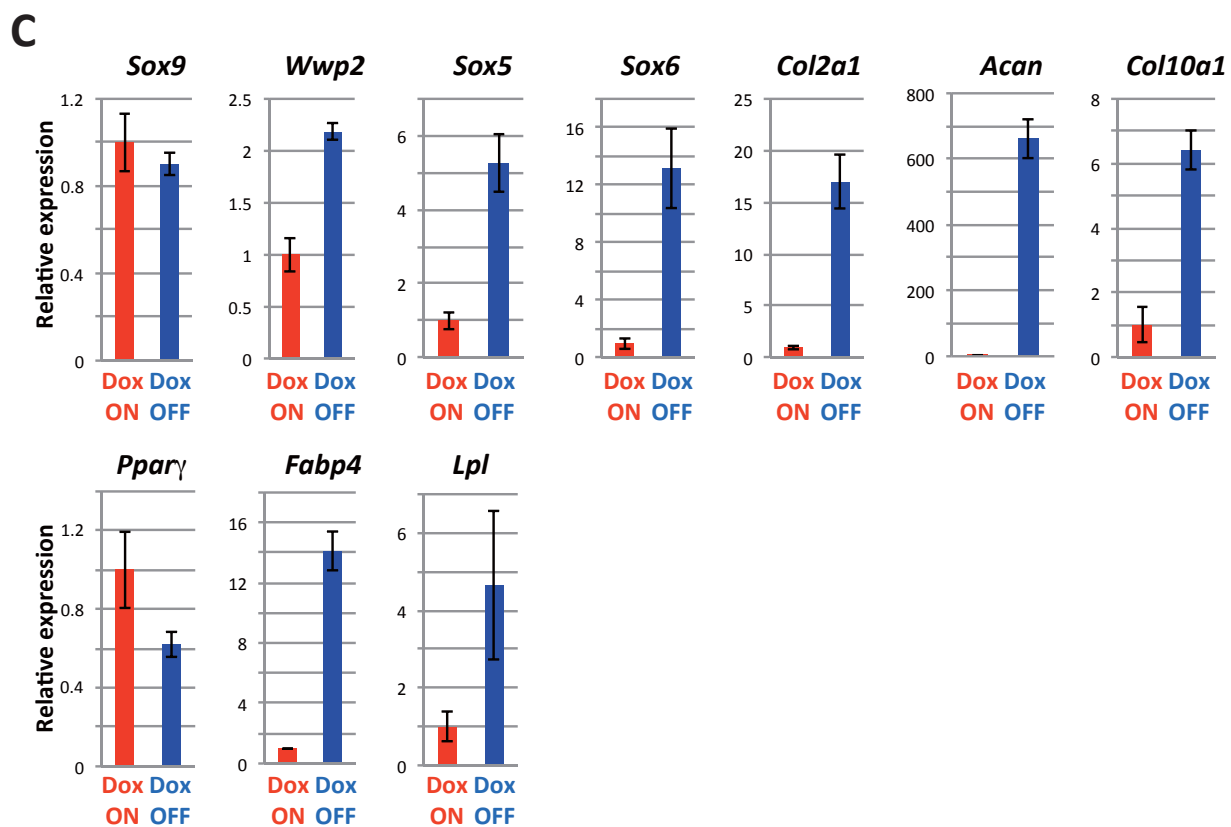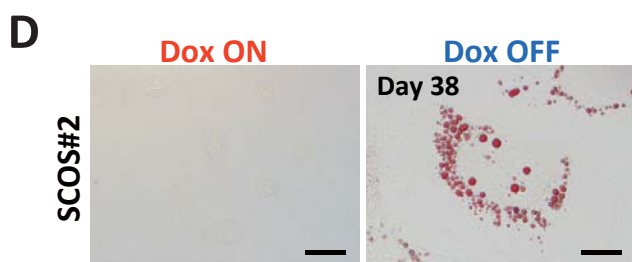

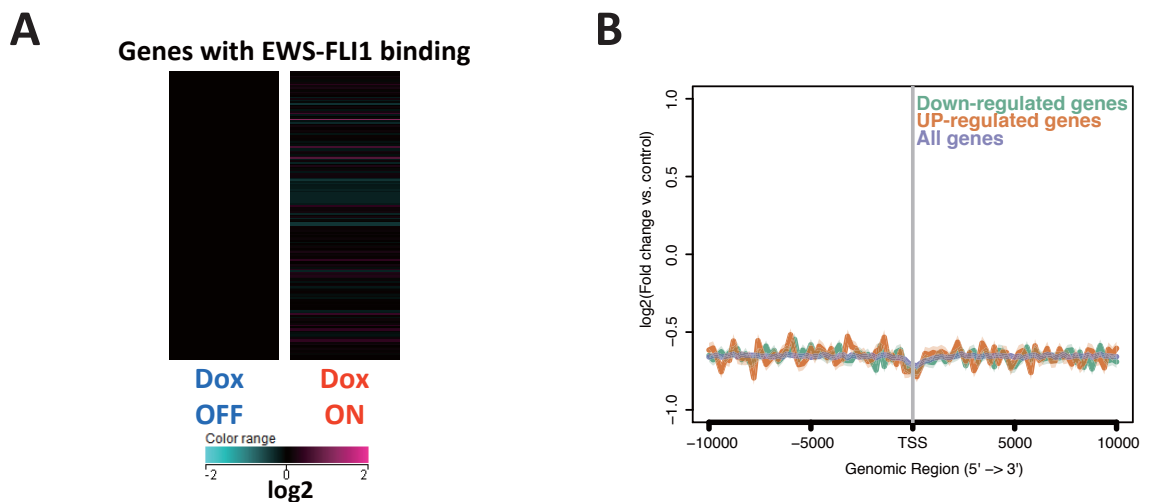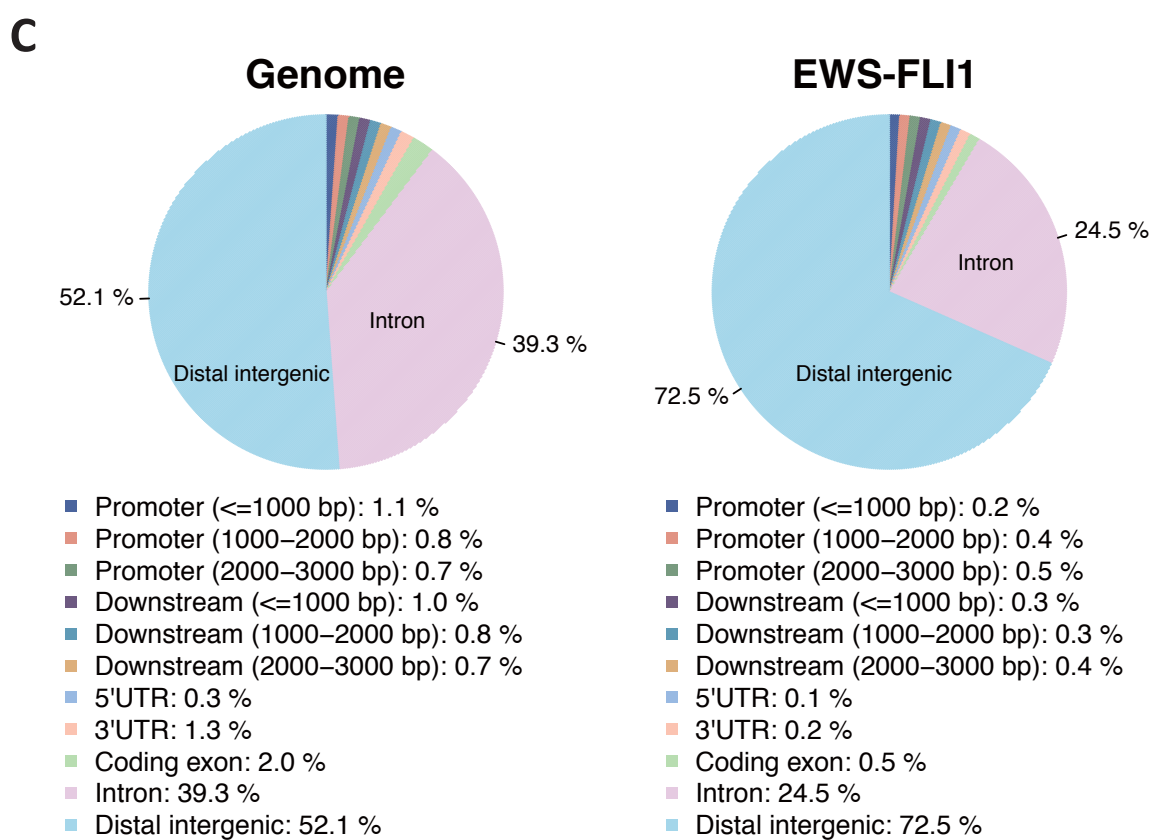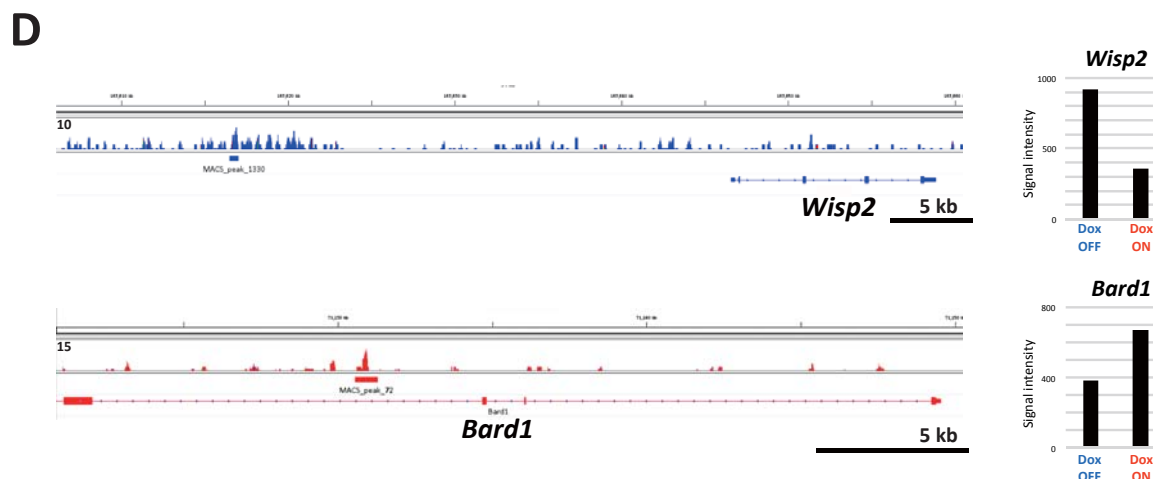



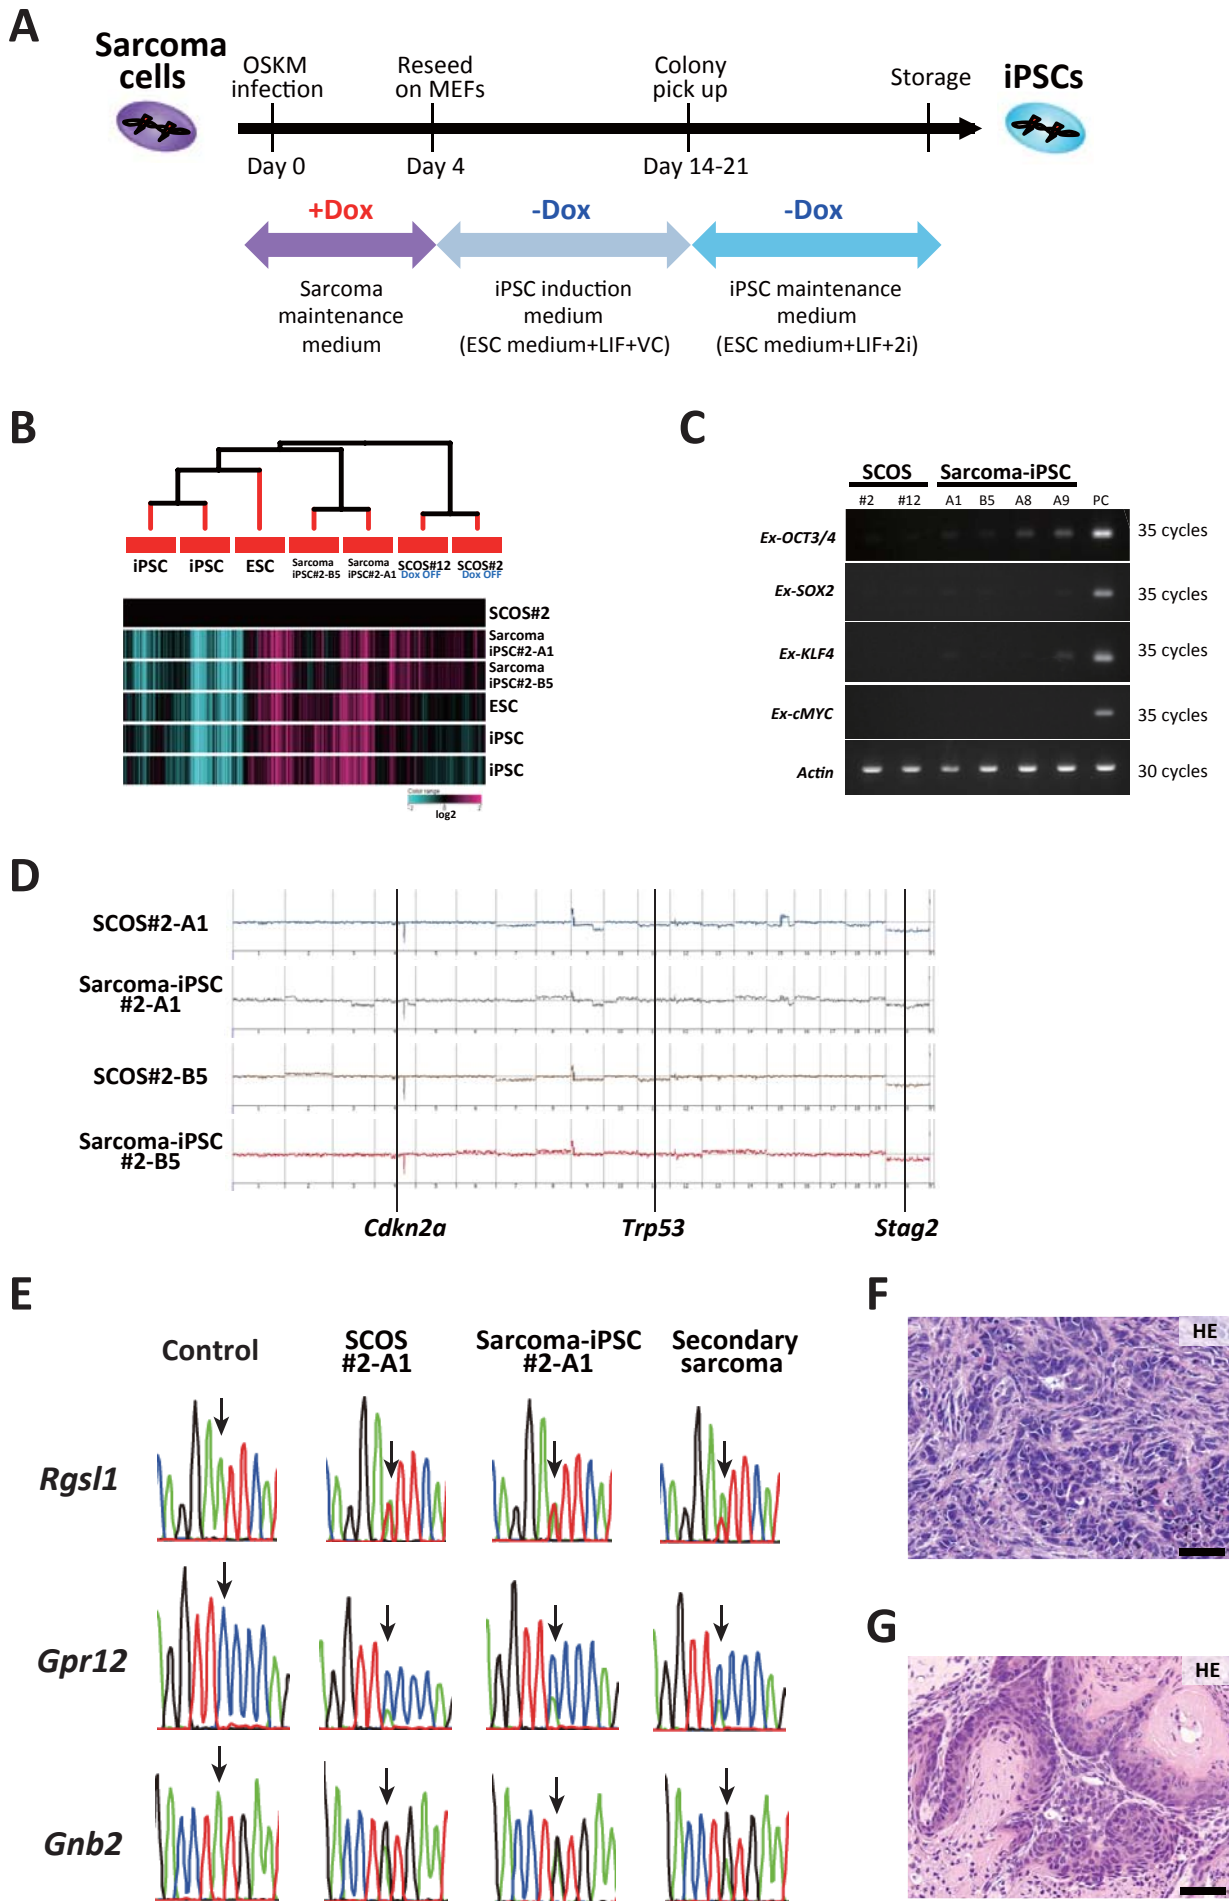

Table S1. Chimerism of examined mice

| Genotype  | Chimerism  |                 |             |
|-----------|------------|-----------------|-------------|
|           | Low (<30%) | Middle (30–60%) | High (>60%) |
| Rosa/Rosa | 6          | 3               | 0           |
| Rosa/Col  | 0          | 4               | 10          |
| Total     | 6          | 7               | 10          |

Table S2. Candidate sites for unique missense mutation to *EWS-FLI1*-induced sarcoma model

| Chr.  | position (mm10) | REF | ALT | Gene symbol   |
|-------|-----------------|-----|-----|---------------|
| chr1  | 26687331        | A   | G   | 4931408C20Rik |
| chr1  | 36419760        | C   | G   | Fer1l5        |
| chr1  | 78665011        | G   | A   | Utp14b        |
| chr1  | 85257408        | C   | T   | C130026l21Rik |
| chr1  | 88055581        | A   | G   | Ugt1a10       |
| chr1  | 88055613        | G   | A   | Ugt1a10       |
| chr1  | 88056307        | A   | G   | Ugt1a10       |
| chr1  | 88256544        | G   | A   | Mroh2a        |
| chr1  | 153822346       | A   | T   | Rgs1          |
| chr1  | 166146689       | G   | C   | Gpa33         |
| chr1  | 174836790       | T   | A   | Grem2         |
| chr2  | 37790432        | C   | G   | Crb2          |
| chr2  | 65098194        | G   | T   | Cobll1        |
| chr3  | 15548853        | G   | T   | Sirpb1b       |
| chr3  | 15548938        | T   | C   | Sirpb1b       |
| chr3  | 55783786        | C   | T   | Mab21l1       |
| chr3  | 108467915       | G   | A   | 5330417C22Rik |
| chr3  | 122936000       | G   | A   | Usp53         |
| chr4  | 40167087        | C   | T   | Aco1          |
| chr4  | 49792844        | T   | G   | Grin3a        |
| chr4  | 88571364        | T   | G   | Ifna14        |
| chr4  | 88816602        | C   | G   | Ifna7         |
| chr4  | 88835585        | C   | G   | Ifna5         |
| chr4  | 88835765        | G   | C   | Ifna5         |
| chr4  | 112835029       | C   | T   | Skint6        |
| chr4  | 112835089       | T   | A   | Skint6        |
| chr4  | 112872460       | T   | G   | Skint6        |
| chr4  | 112883687       | C   | A   | Skint6        |
| chr4  | 112894857       | T   | C   | Skint6        |
| chr4  | 113236373       | G   | T   | Skint6        |
| chr4  | 113238077       | T   | C   | Skint6        |
| chr4  | 113597739       | C   | A   | Skint5        |
| chr4  | 113691069       | C   | G   | Skint5        |
| chr4  | 113731063       | T   | A   | Skint5        |
| chr4  | 113827869       | T   | C   | Skint5        |
| chr4  | 113870717       | C   | T   | Skint5        |
| chr4  | 113923340       | T   | A   | Skint5        |
| chr4  | 113931810       | C   | G   | Skint5        |
| chr4  | 115762250       | T   | C   | Efcab14       |
| chr4  | 118917362       | T   | C   | Olfir1329     |
| chr4  | 134082593       | C   | T   | Aim11         |
| chr4  | 147390321       | A   | G   | Gm13145       |
| chr4  | 156350965       | T   | C   | Gm20782       |
| chr5  | 87694785        | C   | T   | Csn2          |
| chr5  | 104065104       | G   | A   | Nudt9         |
| chr5  | 137529034       | A   | G   | Gnb2          |
| chr5  | 138240988       | G   | A   | Nxpe5         |
| chr5  | 146583613       | C   | A   | Gpr12         |
| chr6  | 97184820        | T   | A   | Uba3          |
| chr6  | 128357780       | G   | A   | Rhno1         |
| chr6  | 128357786       | G   | A   | Rhno1         |
| chr6  | 128357832       | A   | G   | Rhno1         |
| chr6  | 128357852       | G   | A   | Rhno1         |
| chr7  | 43225856        | A   | G   | EU599041      |
| chr7  | 48552900        | G   | T   | Mrgprb2       |
| chr7  | 97501779        | T   | A   | Ints4         |
| chr7  | 106677718       | T   | A   | Olfir693      |
| chr7  | 138836628       | G   | A   | Mapk1ip1      |
| chr7  | 140345816       | G   | T   | Olfir60       |
| chr8  | 17534910        | C   | T   | Csmd1         |
| chr8  | 36584125        | T   | C   | Dlc1          |
| chr8  | 110883353       | C   | T   | Fuk           |
| chr9  | 48450414        | G   | A   | Gm5616        |
| chr9  | 48450432        | C   | T   | Gm5616        |
| chr9  | 108955787       | C   | A   | Col7a1        |
| chr10 | 86905643        | C   | G   | Stab2         |
| chr11 | 58625248        | G   | A   | Olfir323      |
| chr11 | 58625303        | C   | G   | Olfir323      |
| chr11 | 58625761        | G   | A   | Olfir323      |
| chr11 | 58625792        | T   | G   | Olfir323      |
| chr11 | 58625905        | A   | C   | Olfir323      |
| chr11 | 58683931        | G   | T   | Olfir320      |
| chr11 | 58684256        | G   | A   | Olfir320      |
| chr11 | 58684462        | C   | T   | Olfir320      |



|       |           |   |     |               |
|-------|-----------|---|-----|---------------|
| chr11 | 58684714  | G | A   | Olf320        |
| chr11 | 58684721  | T | C   | Olf320        |
| chr11 | 58701957  | A | C   | Olf319        |
| chr11 | 58702326  | C | T   | Olf319        |
| chr11 | 58702395  | C | A   | Olf319        |
| chr11 | 58732373  | T | G   | Olf317        |
| chr11 | 58732648  | T | C   | Olf317        |
| chr11 | 58757966  | G | A   | Olf316        |
| chr11 | 58758068  | C | T   | Olf316        |
| chr11 | 58758104  | A | G   | Olf316        |
| chr11 | 58786946  | A | G   | Olf314        |
| chr11 | 116769067 | G | T   | St6galnac1    |
| chr12 | 64473027  | T | G   | Fscb          |
| chr12 | 76329274  | T | C   | Akap5         |
| chr12 | 101418121 | C | A   | Catsperb      |
| chr12 | 103693807 | G | T   | Serpina1f     |
| chr12 | 104134219 | G | C   | Serpina3b     |
| chr12 | 104340975 | A | G   | Serpina3k     |
| chr12 | 113625541 | T | C   | Ighv5-6       |
| chr12 | 113625945 | C | A   | Ighv5-6       |
| chr12 | 113655233 | G | C   | Ighv5-8       |
| chr12 | 113702423 | T | A   | Ighv5-12      |
| chr12 | 113796269 | A | T'' | Ighv2-6-8     |
| chr12 | 113796269 | A | T'' | Ighv2-6-8     |
| chr12 | 113796269 | A | T'' | Ighv2-6-8     |
| chr12 | 113796269 | A | T'' | Ighv2-6-8     |
| chr12 | 113859405 | T | G   | Ighv5-17      |
| chr12 | 113932083 | C | T   | Ighv14-1      |
| chr12 | 113932196 | G | A   | Ighv14-1      |
| chr12 | 113994755 | G | T   | Ighv14-2      |
| chr12 | 114094228 | G | A   | Ighv9-1       |
| chr12 | 114094229 | C | T   | Ighv9-1       |
| chr12 | 114153426 | A | T   | Ighv7-3       |
| chr12 | 114176681 | G | A   | Ighv14-4      |
| chr12 | 114176691 | G | A   | Ighv14-4      |
| chr12 | 114406948 | G | T   | Ighv6-4       |
| chr12 | 114851275 | A | T   | Ighv1-34      |
| chr12 | 114851307 | C | T   | Ighv1-34      |
| chr12 | 114851322 | T | A   | Ighv1-34      |
| chr12 | 114914615 | C | T   | Ighv1-39      |
| chr12 | 114914857 | A | T   | Ighv1-39      |
| chr12 | 115495818 | T | G   | Ighv1-63      |
| chr12 | 115495858 | C | T   | Ighv1-63      |
| chr12 | 115834373 | A | G   | Ighv1-75      |
| chr12 | 115834392 | C | G   | Ighv1-75      |
| chr12 | 115868845 | T | G   | Ighv1-78      |
| chr13 | 61539620  | C | T   | Ctsm          |
| chr13 | 61568124  | C | T   | Cts3          |
| chr13 | 66431401  | G | A   | 2410141K09Rik |
| chr13 | 66431419  | C | T   | 2410141K09Rik |
| chr13 | 66431466  | C | A   | 2410141K09Rik |
| chr13 | 66432161  | G | T   | 2410141K09Rik |
| chr13 | 67256963  | A | C   | Zfp458        |
| chr13 | 67256967  | T | C   | Zfp458        |
| chr13 | 67256982  | T | C   | Zfp458        |
| chr14 | 113315351 | G | A   | Tpm3-rs7      |
| chr14 | 123954597 | G | A   | Itgbl1        |
| chr15 | 73524148  | G | A   | Dennd3        |
| chr15 | 98950656  | C | G   | Tuba1a        |
| chr16 | 34666699  | C | G   | Ropn1         |
| chr17 | 23311138  | C | A   | Vmn2r114      |
| chr17 | 23311142  | C | G   | Vmn2r114      |
| chr17 | 23346388  | T | A   | Vmn2r115      |
| chr17 | 43064973  | A | T   | Tnfrsf21      |
| chr18 | 12402904  | A | T   | Lama3         |
| chr18 | 60269984  | G | T   | Gm4841        |
| chr18 | 60270026  | C | A   | Gm4841        |
| chr18 | 60270033  | A | T   | Gm4841        |
| chr18 | 60270097  | C | T   | Gm4841        |
| chr19 | 13410580  | T | G   | Olf31469      |
| chr19 | 37916431  | C | T   | Myof          |
| chrX  | 7163391   | C | A   | Clcn5         |
| chrX  | 21083065  | A | T   | Zfp300        |

Table S3. Overlapping mutations in murine *EWS-FLI1* sarcoma model and human sarcomas (Ewing sarcomas/PNETs and osteosarcomas)

| Unique missense mutations in <i>EWS-FLI1</i> -induced sarcoma model |                         | Human Ewings sarcoma-peripheral primitive neuroectodermal tumour |                                                                                                                                                                                                                                                                                                                                                                                                                                                                                                                                                                                                                                                                                                                                                                                                                                                                                                                                                                                                                                                                                                            | Human osteosarcoma                                                   |                                                                                                                                                                                                                                                                      |
|---------------------------------------------------------------------|-------------------------|------------------------------------------------------------------|------------------------------------------------------------------------------------------------------------------------------------------------------------------------------------------------------------------------------------------------------------------------------------------------------------------------------------------------------------------------------------------------------------------------------------------------------------------------------------------------------------------------------------------------------------------------------------------------------------------------------------------------------------------------------------------------------------------------------------------------------------------------------------------------------------------------------------------------------------------------------------------------------------------------------------------------------------------------------------------------------------------------------------------------------------------------------------------------------------|----------------------------------------------------------------------|----------------------------------------------------------------------------------------------------------------------------------------------------------------------------------------------------------------------------------------------------------------------|
| Mouse gene symbol                                                   | Human gene symbol       | Mutated samples (frequency) N=342                                | Detailed information                                                                                                                                                                                                                                                                                                                                                                                                                                                                                                                                                                                                                                                                                                                                                                                                                                                                                                                                                                                                                                                                                       | Mutated samples (frequency) N=58                                     | Detailed information                                                                                                                                                                                                                                                 |
| Csmd1                                                               | CSMD1 (ENST00000537824) | 15 (4.4%)                                                        | 506 c.1518G>A p.S506S COSM1456746 1 Substitution - coding silent<br>1168 c.3502C>T p.R1168C COSM5030424 1 Substitution - Missense<br>1312 c.3934C>G p.P1312A COSM5030038 1 Substitution - Missense<br>1455 c.4365G>T p.L1455L COSM458054 1 Substitution - coding silent<br>1533 c.4598C>T p.S1533S COSM1098201 1 Substitution - coding silent<br>1754 c.5260G>A p.G1754S COSM5029552 1 Substitution - Missense<br>1877 c.5631A>G p.V1877V COSM4588044 1 Substitution - coding silent<br>2138 c.6412C>T p.P2138S COSM4588042 1 Substitution - Missense<br>2220 c.6660A>T p.T2220T COSM4588040 1 Substitution - coding silent<br>2224 c.6672C>A p.T2224T COSM2789183 1 Substitution - coding silent<br>2340 c.7020T>A p.N2340K COSM5029445 1 Substitution - Missense<br>2760 c.8278G>A p.V2760M COSM4588034 1 Substitution - Missense<br>2807 c.8419C>T p.R2807C COSM274673 1 Substitution - Missense<br>2879 c.8635G>A p.A2879T COSM1823896 1 Substitution - Missense<br>2894 c.8682C>T p.N2894N COSM237253 1 Substitution - coding silent<br>2903 c.8709T>G p.S2903R COSM5030558 1 Substitution - Missense | 4 (6.9%)                                                             | 62 c.186C>T p.I62I COSM5023630 1 Substitution - coding silent<br>524 c.1570A>G p.K524E COSM5021506 1 Substitution - Missense<br>1774 c.5320C>A p.Q1774K COSM5024049 1 Substitution - Missense<br>? c.2593>G>C p.? COSM5024485 1 Unknown                              |
| Col7a1                                                              | COL7A1                  | 9 (2.6%)                                                         | 327 c.979G>T p.A327S COSM4584435 1 Substitution - Missense<br>469 c.1405T>C p.Y469H COSM4584434 1 Substitution - Missense<br>593 c.1777C>T p.R593W COSM4584433 1 Substitution - Missense<br>1053 c.3159G>A p.A1053A COSM4584432 1 Substitution - coding silent<br>1158 c.3468C>T p.H1158H COSM4584431 1 Substitution - coding silent<br>1225 c.3673G>C p.A1225P COSM4584430 1 Substitution - Missense<br>1523 c.4567G>A p.P1523T COSM5030007 1 Substitution - Missense<br>2177 c.6527 6528insC p.G2177Fs*13 COSM4584429 1 Insertion - Frameshift<br>2859 c.8575T>G p.S2859A COSM4584428 1 Substitution - Missense                                                                                                                                                                                                                                                                                                                                                                                                                                                                                          | N.D.                                                                 |                                                                                                                                                                                                                                                                      |
| Grin3a                                                              | GRIN3A                  | 5 (1.5%)                                                         | 493 c.1478A>T p.Y493F COSM3167357 1 Substitution - Missense<br>634 c.1902C>T p.I634I COSM4588303 1 Substitution - coding silent<br>708 c.2123G>A p.R708Q COSM3167342 1 Substitution - Missense<br>975 c.2925C>T p.T975T COSM5030015 1 Substitution - coding silent<br>1085 c.3254A>T p.Q1085L COSM4588302 1 Substitution - Missense                                                                                                                                                                                                                                                                                                                                                                                                                                                                                                                                                                                                                                                                                                                                                                        | 3 (5.2%)                                                             | 554 c.1660T>C p.L554L COSM3982644 1 Substitution - coding silent<br>594 c.1781A>T p.D594V COSM1732353 1 Substitution - Missense<br>607 c.1821A>C p.A607A COSM3982643 1 Substitution - coding silent<br>1085 c.3194C>T p.A1085V COSM5023025 1 Substitution - Missense |
| Dennd3                                                              | DENND3                  | 3 (0.9%)                                                         | 449 c.1346C>T p.P449L COSM960520 1 Substitution - Missense<br>542 c.1628C>T p.S542S COSM4587797 1 Substitution - coding silent<br>974 c.2922C>A p.H974Q COSM4587798 1 Substitution - Missense<br>975 c.2923A>G p.S975G COSM4587799 1 Substitution - Missense                                                                                                                                                                                                                                                                                                                                                                                                                                                                                                                                                                                                                                                                                                                                                                                                                                               | 1 (1.7%)                                                             | 363 c.1087C>T p.L363L COSM5021567 1 Substitution - coding silent                                                                                                                                                                                                     |
| Dlc1                                                                | DLC1                    | 3 (0.9%)                                                         | 617 c.1850G>A p.R617Q COSM1096059 1 Substitution - Missense<br>651 c.1951T>C p.F651L COSM4587773 1 Substitution - Missense<br>1055 c.3163A>G p.S1055G COSM1250143 1 Substitution - Missense                                                                                                                                                                                                                                                                                                                                                                                                                                                                                                                                                                                                                                                                                                                                                                                                                                                                                                                | N.D.                                                                 |                                                                                                                                                                                                                                                                      |
| Lama3                                                               | LAMA3                   | 3 (0.9%)                                                         | 1556 c.4668G>A p.P1556P COSM4580342 1 Substitution - coding silent<br>2672 c.8016C>T p.D2672D COSM2807632 1 Substitution - coding silent<br>? c.5112>G>A p.? COSM4580344 1 Unknown                                                                                                                                                                                                                                                                                                                                                                                                                                                                                                                                                                                                                                                                                                                                                                                                                                                                                                                         | N.D.                                                                 |                                                                                                                                                                                                                                                                      |
| Myof                                                                | MYOF                    | 3 (0.9%)                                                         | 366 c.1096C>T p.R366* COSM4573900 1 Substitution - Nonsense<br>662 c.1984G>A p.A662T COSM4573897 1 Substitution - Missense<br>714 c.2142C>T p.N714N COSM3397310 1 Substitution - coding silent                                                                                                                                                                                                                                                                                                                                                                                                                                                                                                                                                                                                                                                                                                                                                                                                                                                                                                             | N.D.                                                                 |                                                                                                                                                                                                                                                                      |
| Ugt1a10                                                             | UGT1A10                 | 2 (0.6%)                                                         | 50 c.150C>T p.L50L COSM3050195 1 Substitution - coding silent<br>374 c.1122T>C p.G374G COSM4583326 1 Substitution - coding silent                                                                                                                                                                                                                                                                                                                                                                                                                                                                                                                                                                                                                                                                                                                                                                                                                                                                                                                                                                          | N.D.                                                                 |                                                                                                                                                                                                                                                                      |
| Orb2                                                                | ORB2                    | 2 (0.6%)                                                         | 93 c.277C>T p.R93C COSM4588458 1 Substitution - Missense<br>104 c.310C>T p.R104C COSM4588460 1 Substitution - Missense                                                                                                                                                                                                                                                                                                                                                                                                                                                                                                                                                                                                                                                                                                                                                                                                                                                                                                                                                                                     | N.D.                                                                 |                                                                                                                                                                                                                                                                      |
| Stab2                                                               | STAB2                   | 2 (0.6%)                                                         | 1041 c.3123C>T p.D1041D COSM4574950 1 Substitution - coding silent<br>1968 c.5903C>A p.A1968D COSM4574951 1 Substitution - Missense<br>2374 c.7121G>A p.R2374Q COSM4574953 1 Substitution - Missense                                                                                                                                                                                                                                                                                                                                                                                                                                                                                                                                                                                                                                                                                                                                                                                                                                                                                                       | N.D.                                                                 |                                                                                                                                                                                                                                                                      |
| St6galnac1                                                          | ST6GALNAC1              | 2 (0.6%)                                                         | 277 c.831G>A p.T277T COSM4580166 1 Substitution - coding silent<br>381 c.1159G>A p.D381N COSM4580165 1 Substitution - Missense                                                                                                                                                                                                                                                                                                                                                                                                                                                                                                                                                                                                                                                                                                                                                                                                                                                                                                                                                                             | N.D.                                                                 |                                                                                                                                                                                                                                                                      |
| 5330417C22Rik                                                       | KIAA1324                | 2 (0.6%)                                                         | 351 c.1052T>C p.M351T COSM4576078 1 Substitution - Missense<br>898 c.2690 2691delAG p.R898fs*56 COSM4576079 1 Deletion - Frameshift                                                                                                                                                                                                                                                                                                                                                                                                                                                                                                                                                                                                                                                                                                                                                                                                                                                                                                                                                                        | N.D.                                                                 |                                                                                                                                                                                                                                                                      |
| Aco1                                                                | ACO1                    | 1 (0.3%)                                                         | 876 c.2828C>T p.N876N COSM4588759 1 Substitution - coding silent                                                                                                                                                                                                                                                                                                                                                                                                                                                                                                                                                                                                                                                                                                                                                                                                                                                                                                                                                                                                                                           | 630 c.1889C>T p.S630L COSM5024313 1 Substitution - Missense          |                                                                                                                                                                                                                                                                      |
| Akap5                                                               | AKAP5                   | 1 (0.3%)                                                         | 350 c.1050T>C p.F350F COSM4577961 1 Substitution - coding silent                                                                                                                                                                                                                                                                                                                                                                                                                                                                                                                                                                                                                                                                                                                                                                                                                                                                                                                                                                                                                                           | 184 c.550G>A p.E184K COSM1300753 1 Substitution - Missense           |                                                                                                                                                                                                                                                                      |
| Clen5                                                               | CLCN5                   | 1 (0.3%)                                                         | 460 c.180T>A p.A460A COSM4589464 1 Substitution - coding silent                                                                                                                                                                                                                                                                                                                                                                                                                                                                                                                                                                                                                                                                                                                                                                                                                                                                                                                                                                                                                                            | 390 c.1168A>C p.N390T COSM5023942 1 Substitution - Missense          |                                                                                                                                                                                                                                                                      |
| Tnfrsf21                                                            | TNFRSF21                | 1 (0.3%)                                                         | 48 c.144G>A p.S48S COSM1079994 1 Substitution - coding silent                                                                                                                                                                                                                                                                                                                                                                                                                                                                                                                                                                                                                                                                                                                                                                                                                                                                                                                                                                                                                                              | 483 c.1447C>T p.R483C COSM5024184 1 Substitution - Missense          |                                                                                                                                                                                                                                                                      |
| Zfp458                                                              | ZNF43                   | 1 (0.3%)                                                         | 717 c.2150G>A p.R717Q COSM4580861 1 Substitution - Missense                                                                                                                                                                                                                                                                                                                                                                                                                                                                                                                                                                                                                                                                                                                                                                                                                                                                                                                                                                                                                                                | 737 c.2209G>A p.E737K COSM5022020 1 Substitution - Missense          |                                                                                                                                                                                                                                                                      |
| Cobll1                                                              | COBLL1                  | 1 (0.3%)                                                         | 973 c.2917G>A p.D973N COSM5030279 1 Substitution - Missense                                                                                                                                                                                                                                                                                                                                                                                                                                                                                                                                                                                                                                                                                                                                                                                                                                                                                                                                                                                                                                                | N.D.                                                                 |                                                                                                                                                                                                                                                                      |
| Mab21l1                                                             | MAB21L1                 | 1 (0.3%)                                                         | 244 c.731G>A p.G244E COSM4575915 1 Substitution - Missense                                                                                                                                                                                                                                                                                                                                                                                                                                                                                                                                                                                                                                                                                                                                                                                                                                                                                                                                                                                                                                                 | N.D.                                                                 |                                                                                                                                                                                                                                                                      |
| AIM1                                                                | AIM1L                   | 1 (0.3%)                                                         | 558 c.1674G>T p.E558D COSM4577167 1 Substitution - Missense                                                                                                                                                                                                                                                                                                                                                                                                                                                                                                                                                                                                                                                                                                                                                                                                                                                                                                                                                                                                                                                | N.D.                                                                 |                                                                                                                                                                                                                                                                      |
| Gnb2                                                                | GNB2                    | 1 (0.3%)                                                         | 291 c.871 880del10 p.D291fs*7 COSM3080668 1 Deletion - Frameshift                                                                                                                                                                                                                                                                                                                                                                                                                                                                                                                                                                                                                                                                                                                                                                                                                                                                                                                                                                                                                                          | N.D.                                                                 |                                                                                                                                                                                                                                                                      |
| Catsperb                                                            | CATSPERB                | 1 (0.3%)                                                         | 41 c.122C>T p.P41L COSM4578062 1 Substitution - Missense                                                                                                                                                                                                                                                                                                                                                                                                                                                                                                                                                                                                                                                                                                                                                                                                                                                                                                                                                                                                                                                   | N.D.                                                                 |                                                                                                                                                                                                                                                                      |
| Itgbl1                                                              | ITGBL1                  | 1 (0.3%)                                                         | 365 c.1093G>T p.D365Y COSM4575812 1 Substitution - Missense                                                                                                                                                                                                                                                                                                                                                                                                                                                                                                                                                                                                                                                                                                                                                                                                                                                                                                                                                                                                                                                | N.D.                                                                 |                                                                                                                                                                                                                                                                      |
| Ifna5                                                               |                         |                                                                  |                                                                                                                                                                                                                                                                                                                                                                                                                                                                                                                                                                                                                                                                                                                                                                                                                                                                                                                                                                                                                                                                                                            |                                                                      |                                                                                                                                                                                                                                                                      |
| Ifna7                                                               | IFNA4                   | 1 (0.3%)                                                         | 60 c.179G>C p.G60A COSM4588738 1 Substitution - Missense                                                                                                                                                                                                                                                                                                                                                                                                                                                                                                                                                                                                                                                                                                                                                                                                                                                                                                                                                                                                                                                   | N.D.                                                                 |                                                                                                                                                                                                                                                                      |
| Ifna14                                                              |                         |                                                                  |                                                                                                                                                                                                                                                                                                                                                                                                                                                                                                                                                                                                                                                                                                                                                                                                                                                                                                                                                                                                                                                                                                            |                                                                      |                                                                                                                                                                                                                                                                      |
| Mrgprb2                                                             | MRGPRX1                 | 1 (0.3%)                                                         | 245 c.733G>T p.D245Y COSM4574247 1 Substitution - Missense                                                                                                                                                                                                                                                                                                                                                                                                                                                                                                                                                                                                                                                                                                                                                                                                                                                                                                                                                                                                                                                 | N.D.                                                                 |                                                                                                                                                                                                                                                                      |
| Olf314                                                              | QR2T8                   | 1 (0.3%)                                                         | 56 c.167C>T p.P56L COSM2232658 1 Substitution - Missense                                                                                                                                                                                                                                                                                                                                                                                                                                                                                                                                                                                                                                                                                                                                                                                                                                                                                                                                                                                                                                                   | N.D.                                                                 |                                                                                                                                                                                                                                                                      |
| Zfp300                                                              | ZNF567                  | 1 (0.3%)                                                         | 409 c.1225 1233delGAGAAA... p.E409 T411delEKT COSM5030662 1 Deletion - In frame                                                                                                                                                                                                                                                                                                                                                                                                                                                                                                                                                                                                                                                                                                                                                                                                                                                                                                                                                                                                                            | N.D.                                                                 |                                                                                                                                                                                                                                                                      |
| Gpa33                                                               | GPA33                   | N.D.                                                             |                                                                                                                                                                                                                                                                                                                                                                                                                                                                                                                                                                                                                                                                                                                                                                                                                                                                                                                                                                                                                                                                                                            | 1 (1.7%) 138 c.413T>C p.L138P COSM5023795 1 Substitution - Missense  |                                                                                                                                                                                                                                                                      |
| Fscb                                                                | FSCB                    | N.D.                                                             |                                                                                                                                                                                                                                                                                                                                                                                                                                                                                                                                                                                                                                                                                                                                                                                                                                                                                                                                                                                                                                                                                                            | 1 (1.7%) 805 c.2414C>T p.A805V COSM5023103 1 Substitution - Missense |                                                                                                                                                                                                                                                                      |
| Olf323                                                              | OR11L1                  | N.D.                                                             |                                                                                                                                                                                                                                                                                                                                                                                                                                                                                                                                                                                                                                                                                                                                                                                                                                                                                                                                                                                                                                                                                                            | 1 (1.7%) 217 c.650C>G p.P217R COSM5023988 1 Substitution - Missense  |                                                                                                                                                                                                                                                                      |

N.D.: not detected

Table S4. Primer sequence

|                                  | Genes                                  | Forward (5' → 3')                                   | Reverse (5' → 3')               |                                |
|----------------------------------|----------------------------------------|-----------------------------------------------------|---------------------------------|--------------------------------|
| qRT-PCR                          | <i>EWS-FLI</i>                         | CAATATAGCCAACAGAGCAGCAG                             | CTCCAAGGGGAGGACTTTTG            | (Ohnishi, Semi et al. 2014)    |
|                                  | <i>Nanog</i>                           | TGCTTACAAGGGTCTGCTACTG                              | TAGAAGAATCAGGGCTGCCTTG          |                                |
|                                  | <i>Oct3/4</i> (endogenous)             | TCCCATGCATTCAAAGTCTGAG                              | CCACCCCTGTTGTGCTTTTA            |                                |
|                                  | <i>Runx2</i>                           | ACAGTCCCAACTCCTGTGC                                 | TTCTCATCATTCCCGGCCATG           |                                |
|                                  | <i>Sp7</i>                             | TTCTCTCCATCTGCCTGACTCC                              | GCTAGAGCCGCCAAAATTTGC           |                                |
|                                  | <i>Col1a1</i>                          | TGGCGGTTATGACTTCAGCTTCCT                            | GGTCACGAACCACGTTAGCATCAT        |                                |
|                                  | <i>Pth1r</i>                           | CCAACTACAGCGAGTGCCTC                                | GGTGAGGGAGGCAAGAGACA            |                                |
|                                  | <i>Bglap</i>                           | AGTGTGAGCTTAACCCTGCTTG                              | ATGCGTTTGTAGGCGGTCTTC           |                                |
|                                  | <i>Dmp1</i>                            | TGATTTGGCTGGGTCAACCAC                               | TGTCCGTGTGGTCACTATTTGC          |                                |
|                                  | <i>Sost</i>                            | AGAACAACCAGACCATGAACCG                              | TGTAICTGGACACATCTTTGGC          |                                |
|                                  | <i>Fgf23</i>                           | CCACGGCAACATTTTTGGATCG                              | TGCGACAAGTAGACGTCATAGC          |                                |
|                                  | <i>Mepe</i>                            | ATGAAGATGCAGGCTGTGTCTG                              | AGATGCTGCCAAGTCTTGTG            |                                |
|                                  | <i>Sox9</i>                            | GCAAGCTGGCAAAGTTGATCTG                              | ACGTGGAAGGTCTCAATGTTGG          |                                |
|                                  | <i>Wwp2</i>                            | AAGTGGAGCGGAGTTAGGC                                 | AAGCTGGGACTTCTCAAAGG            |                                |
|                                  | <i>Sox5</i>                            | CTTTCCCGACATGCACAATTCC                              | TACTTCTCCAGGTGCTGTTTGC          |                                |
|                                  | <i>Sox6</i>                            | ATGGCAAGAAGTCCGGATTG                                | AACACCTGTTCTGTGGTGATG           |                                |
|                                  | <i>Col2a1</i>                          | CCAAACACTTTCCAACCGCAGTCA                            | AGTCTGCCAGTTCAGGTCTCTTA         |                                |
|                                  | <i>Acan</i>                            | TTCACTGTAACCGTGGACT                                 | TGGTCCTGTCTTCTTTACGC            |                                |
|                                  | <i>Col10a1</i>                         | ATAGGCAGCAGCATTACGAC                                | TAGGCGTGCCGTTCTTATAC            |                                |
|                                  | <i>Pparg</i>                           | GCTGTGAAGTTCAATGCACTGG                              | TGCAGCAGGTTGTCTTGATG            |                                |
| <i>Fabp4</i>                     | ATGAAATCACCCGAGACGACAG                 | ATTGTGGTGCAGTTTCCATCCC                              |                                 |                                |
| <i>Lpl</i>                       | AGCCAAGAGAAGCAGCAAGATG                 | AAATCTCGAAGGCCCTGGTTGTG                             |                                 |                                |
| <i>Actb</i>                      | GCCAACCGTGAAAAGATGAC                   | TCCGGAGTCCATCACAATG                                 |                                 |                                |
| RT-PCR                           | <i>Cd99</i>                            | AAGGCCACACGGAGACTCAG                                | TGATAGGCCACGAAGCTCGA            | (Takahashi and Yamanaka 2006)  |
|                                  | <i>Cd99l2</i>                          | TCAGCACCCAGACTAGGAGG                                | GTATCCCCACCTTCCACGA             |                                |
|                                  | <i>Nkx2-2</i>                          | ACCAACACAAAGACGGGGTT                                | GTCAATTGTCCGGTGAAGTGT           |                                |
|                                  | <i>Nr0b1</i>                           | ATGGAGATCCCGGAGACCAA                                | GGATCTGCTGGGTTCTCCAC            |                                |
|                                  | <i>Ex-hOCT3/4</i>                      | GCTCTCCCATGCATTCAAAGTGA                             | CTTACGCGAAATACGGGCAGACA         |                                |
|                                  | <i>Ex-hSOX2</i>                        | TTCACATGTCCCAGCACTACCAGA                            | GACATGGCCTGCCCGTTATTATT         |                                |
|                                  | <i>Ex-hKLF4</i>                        | CCACCTCGCCTTACACATGAAGA                             | GACATGGCCTGCCCGTTATTATT         |                                |
|                                  | <i>Ex-h-cMYC</i>                       | ATACATCCTGTCCGTCCAAGCAGA                            | GACATGGCCTGCCCGTTATTATT         |                                |
|                                  | <i>Actb</i>                            | GCTACAGCTTCAACACCACA                                | CTTCTGCATCCTGTCAGCAA            |                                |
|                                  | Bisulfite genomic sequence             | <i>Nanog</i> promoter                               | GATTTTGTAGGTTGGGATTAATTTGTAATTT |                                |
| <i>Oct3/4</i> distal enhancer    |                                        | GGTTTTAGAGTTGGTTTTGGG                               | CATCTCTCTAACCCTCTCCATAAATC      |                                |
| 5' → 3'                          |                                        |                                                     |                                 |                                |
| Virus integration site detection | Asymmetric linker cassette LC1_adaptor | GACCCGGGAGATCTGAATTCAGTGGCACAG                      |                                 | (Varas, Stadtfeld et al. 2009) |
|                                  | Asymmetric linker cassette LC2_adaptor | CTGTGCCACTG                                         |                                 |                                |
|                                  | 1st_PCR_AP1_F                          | GACCCGGGAGATCTGAATTC                                |                                 |                                |
|                                  | 1st_PCR_pSLIK1_R                       | GTCGAGAGAGCTCCTCTGGTTTC                             |                                 |                                |
|                                  | 2nd_PCR_AP2_F                          | CCTATCCCCTGTGTGCCTTGGCAGTCTCAGGATCTGAATTCAGTGGCACAG |                                 |                                |
|                                  | 2nd_PCR_pSLIK2_R                       | CTTTGCGTTTTCAAGTCCCTGTTCC                           |                                 |                                |
| 3rd_seq.LTR_R                    | CTCAAGGCAAGCTTTATTGAGGC                |                                                     |                                 |                                |

## Legends to Supplemental Figures

### Figure S1; Related to Figure1. *Rosa-M2rtTA/Rosa::tetO-EWS-FLI1* system and phenotype caused by *EWS-FLI1* expression in mice.

- A. Schematic representation of the *Rosa26* targeting allele. *tetO-EWS-FLI1-ires-mCherry* is inserted into intron 1 of the *Rosa26* locus. SA, splice acceptor; ires, internal ribosome entry site; pA, poly(A) sequence; DT-A, diphtheria toxin A.
- B. Southern blot analysis of the Bsd resistant clone using a 5' external probe. Note that the obtained clone harbors both the *Rosa26-M2rtTA* allele and *Rosa26::tetO-EWS-FLI1* allele.
- C. Anti-HA immunostaining of bone in *Rosa::M2rtTA/Coll1a1::tetO-EWS-FLI1* mice. EWS-FLI1 positive cells are observed in the bone marrow after Dox treatment. Scale bars, 100  $\mu\text{m}$  (left) and 50  $\mu\text{m}$  (right).
- D. EWS-FLI1 expressing cells exhibit dysplastic change in the intestine of *Rosa-M2rtTA/Coll1a1::tetO-EWS-FLI1* mice. Scale bars, 200  $\mu\text{m}$ .

### Figure S2; Related to Figure2. Characterization of *EWS-FLI1*-dependent osteosarcoma cell lines SCOS#2 and SCOS#12.

- A. EFV#4 developed spindle cell sarcomas in immunocompromised mice even in the absence of Dox. Scale bar, 50  $\mu\text{m}$ .
- B. *EWS-FLI1*-induced tumor (EFN#2) was negative for Alizarin red staining. Immunohistochemistry using HA and Ki67 antibody revealed that *EWS-FLI1*-induced tumor expresses EWS-FLI1 and has high proliferative activity. Scale bars, 50  $\mu\text{m}$ .
- C. qRT-PCR analysis shows that both SCOS#2 and SCOS#12 express *EWS-FLI1* mRNA in a Dox concentration-dependent manner (0.1-2.0  $\mu\text{g/ml}$ ). Data are presented as mean  $\pm$  SD. The expression level of Dox 0 cells was set to 1.
- D. Morphology of the *EWS-FLI1*-dependent sarcoma cell lines SCOS#2 and SCOS#12 (top). Both cell lines changed their morphology to large and flat cells 6 days after Dox withdrawal (bottom). Scale bars; 200 $\mu\text{m}$ .
- E. The sarcoma cell lines express EWS-FLI1 protein in the presence of Dox. EWS-FLI1 protein was detected by western blotting using anti-HA antibody.
- F. RT-PCR analysis shows that SCOS#2 and SCOS#12 express surface antigen *Cd99*, which is marker of human Ewing sarcoma, and its variant *Cd99l2*. However, *Nkx2-2* and *Nr0b1*, direct targets of *EWS-FLI1* in Ewing sarcoma, were undetectable, suggesting that SCOS#2 and SCOS#12 have

- different properties from Ewing sarcoma.
- G. Immunocytochemistry for p53 and p21. The withdrawal of Dox leads to the increased expression of p53 and p21 and to growth arrest. Senescence associated beta-galactosidase (SA $\beta$ gal) activity was not observed. Scale bars, 200  $\mu$ m (first three columns) and 50  $\mu$ m (right column).
  - H. Re-administration of Dox gives proliferative potential to resting sarcoma cells, suggesting that the cell cycle arrest was induced in sarcoma cells by the withdrawal of *EWS-FLII* expression. Scale bars; 200 $\mu$ m.
  - I. The lentivirus integration site was investigated by LM-PCR (Varas et al., 2009). The analysis identified the integration site downstream region of the *Cd14* gene.

**Figure S3; Related to Figure3. Gene expression change in *EWS-FLII*-dependent osteosarcoma cell lines**

- A. Expression of upregulated and downregulated genes in human Ewing sarcomas and human osteosarcomas in SCOS#2 and SCOS#12. Note that SCOSs exhibit a partial similarity with both human Ewing sarcomas and human osteosarcomas. Published microarray data of 8 human Ewing sarcomas (GSM213306, GSM213307, GSM213308, GSM213309, GSM213310, GSM510019, GSM510022 and GSM510025), 3 human MSCs (GSM906367, GSM906368 and GSM906369), 8 human osteosarcomas (GSM1349294, GSM1517387, GSM1727193, GSM1727195, GSM1727196, GSM1727197, GSM1893361 and GSM1893364) and 3 murine MSCs (GSM1180589, GSM1180590 and GSM1180591) were used (Feng et al., 2015; Grilli et al., 2015; Kawano et al., 2015; Lu et al., 2015; Mackintosh et al., 2012; Miyagawa et al., 2008; Ullah et al., 2014). For this analysis, we first extracted upregulated and downregulated genes in human Ewing sarcomas and human osteosarcomas when compared with human MSCs (two folds). Then, upregulated and downregulated genes specific to Ewing sarcoma or osteosarcoma were identified by comparing the two gene sets (two folds higher or lower in each sarcoma type), respectively. Gene symbols in a human microarray platform (GeneChip U133 Plus 2.0 Array) were converted to gene symbols in a mouse microarray platform (GeneChip Mouse Gene 1.0ST Array) and analyzed for gene expressions.
- B. Gene ontology enrichment analysis showed that extracellular region and matrix-related genes are upregulated in Dox OFF (72 hrs after withdrawal) compared to Dox ON in SCOS#12. The upregulated genes were selected by a cutoff point at fold change >2.0 and p-value <1.0E-4. The top 4 enriched clusters are highlighted.
- C. The increased expression of chondrogenic and adipogenic differentiation-related genes in sarcoma cells at 38 days after Dox withdrawal. mRNA expression levels were measured by qRT-PCR. Data

are presented as mean  $\pm$  SD. The expression level of Dox ON cells was set to 1.

- D. At 38 days after Dox withdrawal, sarcoma cells exhibited positive staining for Oil red O. Scale bars; 20 $\mu$ m.

**Figure S4; Related to Figures 3. ChIP-seq analysis for EWS-FLI1 binding to SCOS#2.**

- A. Genes which possess EWS-FLI1 binding sites close to their TSS ( $\pm$ 5 kb, 126 genes and 181 probe sets) were analyzed for their expression. No obvious difference in the expression levels was detected between Dox ON and OFF sarcomas.
- B. EWS-FLI1-binding near the TSSs of upregulated/downregulated genes. No obvious enrichment was observed in either upregulated or downregulated genes.
- C. The distribution of EWS-FLI1 binding sites. Right: regions of EWS-FLI1 binding to SCOS#2, Left: regions of the reference genome. EWS-FLI1 preferentially binds to the distal intergenic region of SCOS#2.
- D. Representative genes (*Wisp2* and *Bard1*) dysregulated in SCOS#2. EWS-FLI1 binds at the distal intergenic region near *Wisp2* and at the intron of *Bard1*.

**Figure S5; Related to Figures 4 and 5. Characterization of sarcoma-derived iPSCs and secondary sarcomas derived from these iPSCs.**

- A. Schematic illustration of the iPSC derivation protocol from *EWS-FLI1*-dependent osteosarcoma cells.
- B. Hierarchical clustering analysis of *EWS-FLI1*-induced sarcoma, sarcoma-iPSCs and control ESCs/iPSCs (GSE45916) (Ohta et al., 2013). Comparison of global gene expressions by microarray analysis indicated that sarcoma-iPSCs have normal PSC-like gene expression patterns. Color range is shown using a log<sub>2</sub> scale.
- C. RT-PCR showed the silencing of exogenous *OCT3/4*, *SOX2*, *KLF4* and *cMYC* expression in established sarcoma-iPSC-like cells.
- D. Array CGH analysis of parental sarcoma cells and the established iPSCs. Some chromosomal abnormalities are identical between sarcoma-derived iPSCs and the parental sarcoma cells. The locations of *Stag2*, *Trp53*, and *Cdkn2a*, which are common mutated genes in human Ewing sarcoma, are indicated. SCOS#2 was established from bone marrow stromal cells of male *Rosa26-M2rtTA* mouse. Genomic DNA from female C57BL/6 mice was used as reference for the CGH analysis.
- E. Direct sequencing results of representative genetic mutations in sarcoma cells (SCOS#2), sarcoma-iPSCs and the secondary sarcoma, which were identified by exome analysis.
- F. Secondary sarcomas derived from the sarcoma-iPSCs often contain the carcinoma component. Scale

bar, 50  $\mu\text{m}$ .

- G. Parakeratosis of squamous epithelium is detected in sarcoma iPSCs-derived teratomas, which implies the impairment of terminal differentiation. Scale bar, 50  $\mu\text{m}$ .



## Supplemental Experimental Procedures

### **Rosa26 targeting vector, ESC targeting and generation of chimeric mice**

The *EWS-FLII* type1 fusion gene was cloned from Ewing sarcoma cell line TC135 (Takigami et al., 2011). For the *Rosa-M2rtTA/Rosa::tetO-EWS-FLII* system, the Red/ET BAC recombination system was used to introduce *TetOP-EWS-FLII-FLAG-HA-ires-mCherry-pA* and the selection cassette (*SA-rox-PGK-EM7-BsdR-pA-rox-2pA*) into intron 1 of *Rosa26* BAC. The obtained vector was electropolated to KH2 ESCs, which had the *Rosa26-M2rtTA* allele (Beard et al., 2006). ESCs were cultured with ES media containing 15 µg/ml BlasticidinS (Bsd, Funakoshi). Bsd-resistant colonies were picked up and expanded. Correctly targeted ES clones were confirmed by Southern blotting. For the *Rosa-M2rtTA/Coll1a1::tetO-EWS-FLII* system, the *EWS-FLII-FLAG-HA-ires-mCherry-pA* sequence was inserted into pBS31, which was electropolated into KH2 ESCs as described previously (Beard et al., 2006). In both systems, chimeric mice were obtained by blastocyst injection.

### **Lentivirus vector construction, lentivirus infection and cell culture**

To construct the doxycycline inducible lentiviral vector, we modified pEN-TmiRC3 and pSLIK-Neo lentiviral vector plasmids obtained from Addgene. First, pEN-TmiRC3 was digested with SpeI and XhoI to ligate *EWS-FLII-FLAG-HA* downstream of the tetOP-mCMV promoter. Subsequently, the *ires-NeoR* cassette was ligated at the 3' of HA tag, followed by the excision of the *UbiC-rtTA3-ires-NeoR* sequence from pSLIK-Neo. After LR recombination between pEN-TmiRC3 (*tetO-EWS-FLII-ires-Neo*) and pSLIK (without *UbiC-rtTA3-ires-Neo*), we obtained the pSLIK-*TetO-EWS-FLII-ires-Neo* vector.

Bone marrow stromal cells were obtained from *Rosa26-M2rtTA* mice (Beard et al., 2006) at 3-4 weeks of age as reported previously (Soleimani and Nadri, 2009). At 3-4 days after the harvesting of bone marrow cells, non-adherent cells (hematopoietic cells) were removed by changing the culture media, and the adherent cells were infected with lentivirus. The cells were then cultured with DMEM (Nacalai) containing 10% FBS (Gibco), penicillin, streptomycin, 200 µg/ml G418 (Nacalai) and 2 µg/ml Dox (Sigma) for 2 months, and *EWS-FLII*-dependent immortalized cells were established. Osteosarcoma cell lines, SCOS#2 and SCOS#12, were maintained in the same medium.

### **Single cell cloning**

Single cell sorting of SCOS#2 and SCOS#12 cells was performed by FACS (Aria II, BD) in 96-well culture plates. Each sorted cell was cultured and expanded with Dox- and G418-containing

medium.

### **Cell growth assay**

Sarcoma cells and ESCs/iPSCs were plated into 12 well culture plates at a density of  $5 \times 10^4$  cells/well and  $1 \times 10^5$  cells/well, respectively. The experiment was performed in triplicate, and each sample was measured twice. The number of cells was measured by an automatic cell counter (TC10™, Bio-Rad).

### **Xenograft assay**

A total of  $3 \times 10^6$  *EWS-FLII*-dependent immortalized cells, *EWS-FLII*-dependent sarcoma cells or ESCs/iPSCs were transplanted to NOD/ShiJic-scid Jcl mice or BALB/cSLC-nu/nu mice purchased from CLEA Japan and Japan SLC, respectively. *EWS-FLII*-dependent immortalized cells were inoculated into NOD/ShiJic-scid Jcl mice, which were sacrificed at 10 weeks after the transplantation. *EWS-FLII*-dependent osteosarcoma cells were inoculated into the subcutaneous tissue of BALB/cSLC-nu/nu mice. The tumor size was measured with digital calipers every week, and tumor volume was calculated as follows:  $\text{volume} = \text{width}^2 \times \text{length} \div 2$ . ESCs/iPSCs were transplanted into BALB/cSLC-nu/nu mice, and teratomas were obtained after 3-4 weeks.

### **RT-PCR and real-time quantitative RT-PCR**

RNA was extracted using RNeasy Plus Mini Kit (QIAGEN). Up to 1  $\mu\text{g}$  RNA was used for the reverse transcription reaction into cDNA. RT-PCR and real-time quantitative PCR were performed using Go-Taq Green Master Mix and Go-Taq qPCR Master Mix (Promega), respectively. Transcript levels were normalized by  $\beta$ -actin. PCR primers are available in Table S4.

### **Western blot analysis**

Cultured cells were harvested in 500  $\mu\text{l}$  of RIPA lysis buffer, and protein concentration was measured. Proteins were denatured with  $2 \times \text{SDS}$  in  $95^\circ\text{C}$  for 5 min. A total of 20  $\mu\text{g}$  denatured protein was applied to 10% SDS/PAGE gel and transferred to PVDF membrane (Amersham Hybond-P PVDF Membrane, GE HealthCare). Proteins were detected by immunoblotting with anti-HA (Cell Signaling, C29F4, #3724; dilution 1:600) and anti- $\beta$  actin (Santa Cruz, C4, sc-47778; dilution 1:1000) antibodies. Pierce ECL plus Western Blotting Substrate (Thermo Scientific) was used for visualization, and LAS4000 (GE HealthCare) was used for detection.

### **Histological analysis and immunohistochemistry**

All tissue and tumor samples were fixed with 4% paraformaldehyde overnight and embedded in paraffin. Sections were stained with hematoxylin and eosin using standard protocol. For immunohistochemistry, the antibodies used were anti-HA (Cell signaling, C29F4, #3724; dilution 1:200) and anti-Ki67 (Abcam, SP6, ab16667; dilution 1:150).

### **Immunocytochemistry**

Cultured cells were washed with PBS and fixed with 2% paraformaldehyde for 10 min at room temperature. For immunocytochemistry, antibodies used were anti-p53 (Abcam, PAb240, ab26; dilution 1:200) and anti-p21 (Abcam, HUGO291, ab107099; dilution 1:500).

### **ALP staining**

Cultured cells were washed with PBS, fixed and stained with ALP Staining Kit (Sigma) according to the manufacturer's protocol.

### **Senescence-associated $\beta$ -gal staining**

Cultured cells were washed with PBS, fixed and stained with Senescence  $\beta$ -galactosidase Staining Kit (#9860S, Cell Signaling) according to the manufacturer's protocol.

### **Alizarin red staining**

Cultured cells were washed with PBS and fixed with 4% paraformaldehyde for 5 min at room temperature. Fixed cells were washed with de-ionized water several times and stained in Alizarin red staining solution for 5 min (Alizarin red (Sigma, A5533) 2%, pH4.2 adjusted with  $\text{NH}_4\text{OH}$ ). Similarly, de-paraffinized sections were stained in Alizarin red staining solution for 5 min.

### **Oil red O staining**

Cultured cells were washed with PBS and fixed with 4% paraformaldehyde for 10 min at room temperature. Fixed cells were washed with 60% iso-propanol for 1 min and stained in oil red staining solution for 10 min (Oil red O (Sigma, O0625) 0.18% with 60% iso-propanol).

### **Detection of lentivirus integration site**

We explored lentivirus integration sites as previously described with slight modifications (Varas et al., 2009). Extracted genomic DNA from SCOS#2 was digested into 500-800 bp fragments with

an ultrasonicator (Covaris E210). The linker-cassette obtained from annealing LC1 and LC2 was attached to the digested genomic DNA fragments. Subsequently, the first PCR was performed with AP1\_F and pSLIK1\_R primer set, followed by a nested PCR with AP2\_F and pSLIK2\_R primer set. PCR products were cloned to the pCR4-TOPO vector (Invitrogen) by the TA cloning method, and DNA sequences of the inserted fragments were analyzed by 3500xL Genetic Analyzer (Applied Biosystems) with seq\_LTR\_R primer. The obtained sequences were explored in at the BLAST website (<http://blast.ncbi.nlm.nih.gov/Blast.cgi>).

### **Bisulfite genomic sequencing**

Bisulfite treatment was performed using the EZ DNA Methylation-Gold Kit<sup>TM</sup> (ZYMO RESEARCH) according to the manufacturer's protocol. The PCR primers used are shown in Supplemental information. Amplified products were cloned into the pCR4-TOPO vector (Invitrogen) and transformed into DH5 $\alpha$ . Colonies were randomly selected and sequenced with M13 forward and reverse primers for each gene.

### **ChIP-seq analysis**

ChIP (Formaldehyde-Assisted Isolation of Regulatory Elements) was performed as described previously (Arioka et al., 2012). Anti-HA antibody (Nacalai, HA124, 06340-54) was used for the ChIP-seq analysis. Sequencing libraries were generated using TruSeq ChIP Sample Prep Kit (Illumina), assessed on an Agilent Bioanalyzer and quantified with KAPA Library Quantification Kits (KAPA BIOSYSTEMS). The libraries were sequenced to generate single-end 100 bp reads using Illumina MiSeq. We analyzed ChIP-seq data by mapping the reads using Bowtie2. The sequencing reads were aligned to mouse genome build mm9. We used the MACS (Zhang et al., 2008) version 1.4.2 peak finding algorithm to identify regions of ChIP-seq enrichment over background with p value  $1 \times 10^{-3}$ . To analyze and visualize the mapped reads, ngsplot was used (Shen et al., 2014). The motif analysis was performed using HOMER (Hypergeometric Optimization of Motif EnRichment) software (Heinz et al., 2010).

### **Exome analysis and direct sequencing**

Genomic DNA of SCOS#2-A1, sarcoma iPSC#2-A1 and sarcoma-iPSC#2-A1-derived secondary sarcoma was extracted with PureLink<sup>®</sup> Genomic DNA Mini Kit (Invitrogen). Whole-exome capture was done with the SureSelect XT (Agilent Technologies). The exome libraries were then sequenced on a HiSeq2500 (Illumina). Raw sequencing reads were mapped to the mouse reference genome (mm10) using the Burrows-Wheeler Aligner (bwa-0.7.12) and were processed with SAMtools (samtools-1.2). Genome

Analysis Toolkit (GATK version: 3.5) was used to perform base recalibration and local realignment. SNVs and indels were called by the GATK HaplotypeCaller. We selected somatic variants by removing SNPs and indels reported in the mm10 (VCF file was downloaded from NCBI) and by removing the overlapping variants present in 129S1/Sv exome data (SRP007328). Remaining variants were annotated by SnpEff version 4.2 using RefGene GRCm38.82. To this end, we detected 15567, 16221 and 15338 variants including 577, 620 and 554 missense mutations in SCOS#2-A1, sarcoma iPSC#2-A1 and the secondary sarcoma, respectively. 405 missense mutations were overlapped in SCOS#2-A1, sarcoma iPSC#2-A1 and the secondary sarcoma. In order to extract unique mutations to this sarcoma model, the missense mutations were further compared with exome data of other tumor models (colon tumor and clear cell sarcoma model; submitted). A list of the unique mutations was shown in Table S2. For direct sequencing analysis, the PCR product containing the mutation candidate site was sequenced with the genetic analyzer ABI 3500xL (Applied Biosystems).

## Supplemental References

- Arioka, Y., Watanabe, A., Saito, K., and Yamada, Y. (2012). Activation-induced cytidine deaminase alters the subcellular localization of Tet family proteins. *PLoS One* 7, e45031.
- Beard, C., Hochedlinger, K., Plath, K., Wutz, A., and Jaenisch, R. (2006). Efficient method to generate single-copy transgenic mice by site-specific integration in embryonic stem cells. *Genesis* 44, 23-28.
- Feng, Y., Sassi, S., Shen, J.K., Yang, X., Gao, Y., Osaka, E., Zhang, J., Yang, S., Yang, C., Mankin, H.J., *et al.* (2015). Targeting CDK11 in osteosarcoma cells using the CRISPR-Cas9 system. *J Orthop Res* 33, 199-207.
- Grilli, A., Sciandra, M., Terracciano, M., Picci, P., and Scotlandi, K. (2015). Integrated approaches to miRNAs target definition: time-series analysis in an osteosarcoma differentiative model. *BMC Med Genomics* 8, 34.
- Heinz, S., Benner, C., Spann, N., Bertolino, E., Lin, Y.C., Laslo, P., Cheng, J.X., Murre, C., Singh, H., and Glass, C.K. (2010). Simple combinations of lineage-determining transcription factors prime cis-regulatory elements required for macrophage and B cell identities. *Mol Cell* 38, 576-589.
- Kawano, M., Tanaka, K., Itonaga, I., Ikeda, S., Iwasaki, T., and Tsumura, H. (2015). microRNA-93 promotes cell proliferation via targeting of PTEN in Osteosarcoma cells. *J Exp Clin Cancer Res* 34, 76.
- Lu, J., Song, G., Tang, Q., Zou, C., Han, F., Zhao, Z., Yong, B., Yin, J., Xu, H., Xie, X., *et al.* (2015). IRX1 hypomethylation promotes osteosarcoma metastasis via induction of CXCL14/NF- $\kappa$ B signaling. *J Clin Invest* 125, 1839-1856.
- Mackintosh, C., Ordóñez, J.L., García-Domínguez, D.J., Sevillano, V., Llombart-Bosch, A., Szuhai, K., Scotlandi, K., Alberghini, M., Sciort, R., Sinnaeve, F., *et al.* (2012). 1q gain and CDT2 overexpression underlie an aggressive and highly proliferative form of Ewing sarcoma. *Oncogene* 31, 1287-1298.
- Miyagawa, Y., Okita, H., Nakajima, H., Horiuchi, Y., Sato, B., Taguchi, T., Toyoda, M., Katagiri, Y.U., Fujimoto, J., Hata, J., *et al.* (2008). Inducible expression of chimeric EWS/ETS proteins confers Ewing's family tumor-like phenotypes to human mesenchymal progenitor cells. *Mol Cell Biol* 28, 2125-2137.
- Ohta, S., Nishida, E., Yamanaka, S., and Yamamoto, T. (2013). Global splicing pattern reversion during somatic cell reprogramming. *Cell Rep* 5, 357-366.
- Shen, L., Shao, N., Liu, X., and Nestler, E. (2014). ngs.plot: Quick mining and visualization of next-generation sequencing data by integrating genomic databases. *BMC Genomics* 15, 284.
- Soleimani, M., and Nadri, S. (2009). A protocol for isolation and culture of mesenchymal stem cells from mouse bone marrow. *Nat Protoc* 4, 102-106.
- Takigami, I., Ohno, T., Kitade, Y., Hara, A., Nagano, A., Kawai, G., Saitou, M., Matsushashi, A., Yamada, K., and Shimizu, K. (2011). Synthetic siRNA targeting the breakpoint of EWS/Fli-1 inhibits growth of

Ewing sarcoma xenografts in a mouse model. *Int J Cancer* 128, 216-226.

Ullah, M., Sittinger, M., and Ringe, J. (2014). Transdifferentiation of adipogenically differentiated cells into osteogenically or chondrogenically differentiated cells: phenotype switching via dedifferentiation. *Int J Biochem Cell Biol* 46, 124-137.

Varas, F., Stadtfeld, M., de Andres-Aguayo, L., Maherli, N., di Tullio, A., Pantano, L., Notredame, C., Hochedlinger, K., and Graf, T. (2009). Fibroblast-derived induced pluripotent stem cells show no common retroviral vector insertions. *Stem Cells* 27, 300-306.

Zhang, Y., Liu, T., Meyer, C.A., Eeckhoute, J., Johnson, D.S., Bernstein, B.E., Nusbaum, C., Myers, R.M., Brown, M., Li, W., *et al.* (2008). Model-based analysis of ChIP-Seq (MACS). *Genome Biol* 9, R137.
